# Supplementary material for: Localize Animal Sound Events Reliably (LASER): A New Software for Sound Localization in Zoos
Source: MDPI journal article supplement (doi:10.3390/jzbg2020011), 2021-04-01
Supplement: s1 [file s1]

**Table S1.** A) Shows the height of the sound sources when positioned above the ground and the height difference between the position of the microphones and the corresponding sound source positioned on the ground. B) Shows the deviation from the actual position calculated by the simulation, which is caused by the height difference when the Bluetooth speaker is placed on the ground.

| A                                         |    |                                                                                           |      |      |      |       |      |      |      |
|-------------------------------------------|----|-------------------------------------------------------------------------------------------|------|------|------|-------|------|------|------|
| Height of the source above the ground (m) |    | Height difference between microphone and the corresponding sound source on the ground (m) |      |      |      |       |      |      |      |
|                                           |    | M1                                                                                        | M2   | M3   | M4   | M5    | M6   | M7   | M8   |
| 0.35                                      | S1 | 3.8                                                                                       | 3.75 | 3.75 | 2.85 | 1.5   | 1.55 | 1.65 | 1.75 |
| 1.5                                       | S2 | 2.65                                                                                      | 2.6  | 2.6  | 1.7  | 0.35  | 0.4  | 0.5  | 0.6  |
| 2.3                                       | S3 | 1.85                                                                                      | 1.8  | 1.8  | 0.9  | -0.45 | -0.4 | -0.3 | -0.2 |
| 0.5                                       | S4 | 3.65                                                                                      | 3.6  | 3.6  | 2.7  | 1.35  | 1.4  | 1.5  | 1.6  |
| -0.35                                     | S5 | 4.5                                                                                       | 4.45 | 4.45 | 3.55 | 2.2   | 2.25 | 2.35 | 2.45 |

  

| B                      |                      |                      |                      |                      |                      |
|------------------------|----------------------|----------------------|----------------------|----------------------|----------------------|
| Position               | S1 <sub>ground</sub> | S2 <sub>ground</sub> | S3 <sub>ground</sub> | S4 <sub>ground</sub> | S5 <sub>ground</sub> |
| Accuracy deviation (m) | 0.067                | 0.013                | 0.065                | 0.148                | 0.292                |
